# Supplementary material for: Durability of Antibody Response after Primary Pneumococcal Double-Dose Prime-Boost Vaccination in Adult Kidney Transplant Recipients and Candidates: 18-Month Follow-Up in a Non-Blinded, Randomised Clinical Trial
Source: MDPI journal article supplement (doi:10.3390/vaccines10071091), 2022-07-07
Supplement: s1 [file s1]

**Supplementary Figure S1: Geometric mean concentrations for 12 pneumococcal serotype-specific IgG antibodies in mg/L at baseline, week 12 (pre-PPV23), week 17, and week 96. Note that the scale of the y-axis is different for all serotypes.**

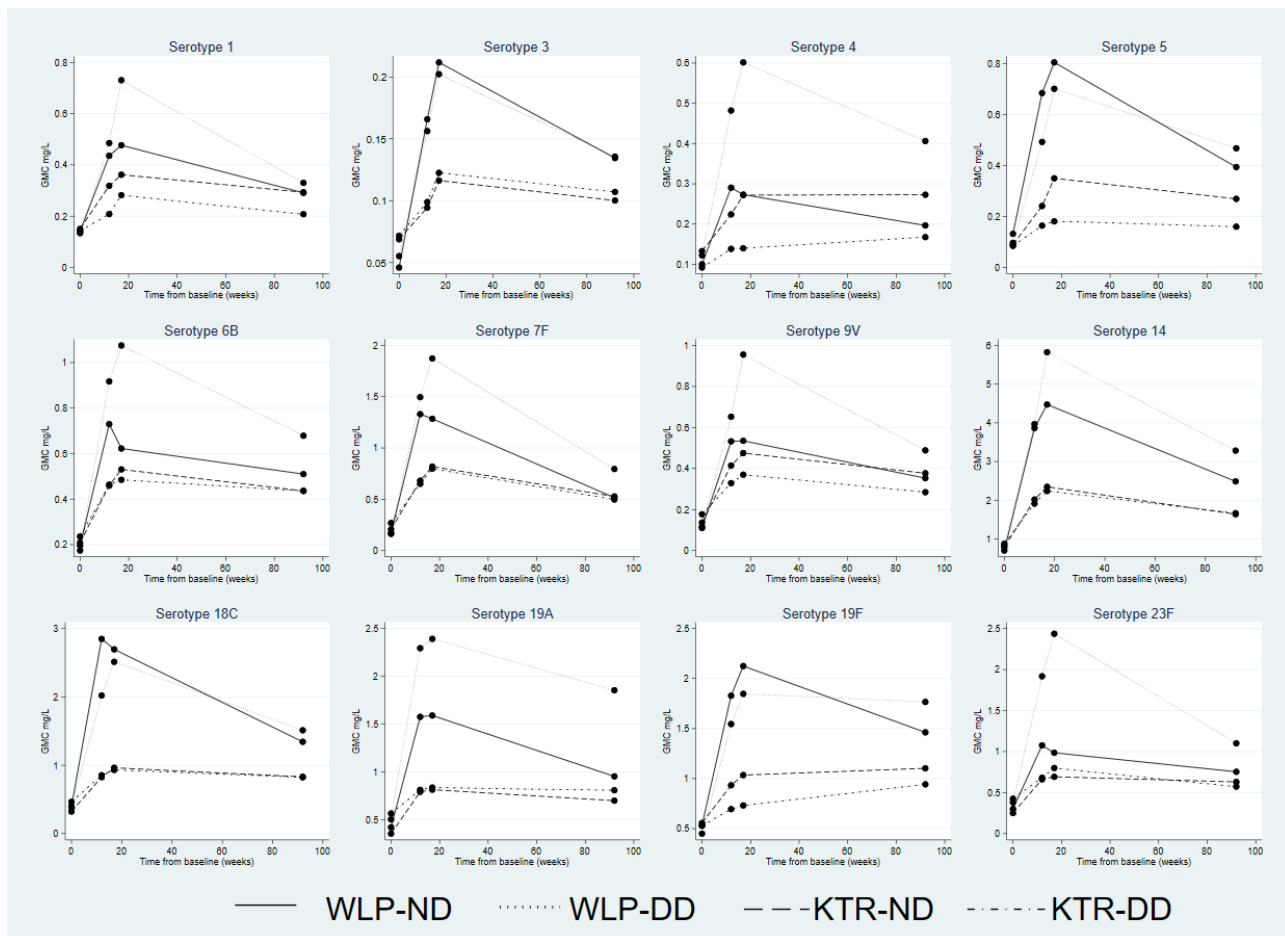

Abbreviations: GMC, Geometric mean concentration; WLP-ND, patients on the kidney transplant waiting list – normal dose; WLP-DD, patients on the kidney transplant waiting list – double dose; KTR-ND, kidney transplant recipient – normal dose; KTR-DD, kidney transplant recipient – double dose; PPV23, 23-valent pneumococcal polysaccharide.

**Supplementary Table S1: Geometric mean concentrations (95% confidence interval) for 12 pneumococcal serotype-specific IgG antibodies at each visit, with p-values for comparisons within groups and between normal and double dosages.**

| Serotype | Treatment groups | Baseline         | P-value Baseline: | Week12           | P-value Week 12: | P-value Week 12: | Week 17          | P-value Week 17: | P-value Week 17: | P-value Week 17: | Week 96          | P-value Week 96: | P-value Week 96: |
|----------|------------------|------------------|-------------------|------------------|------------------|------------------|------------------|------------------|------------------|------------------|------------------|------------------|------------------|
|          |                  |                  |                   |                  |                  |                  |                  |                  |                  |                  |                  |                  |                  |
| 1        | WLP-ND           | 0.14 (0.09-0.21) | 0.918             | 0.44 (0.22-0.86) | 0.487            | ≤0.001           | 0.48 (0.25-0.91) | 0.176            | 0.781            | ≤0.001           | 0.29 (0.16-0.55) | 0.605            | ≤0.001           |
|          | WLP-DD           | 0.13 (0.09-0.20) |                   | 0.49 (0.27-0.86) |                  | ≤0.001           | 0.73 (0.41-1.30) |                  | ≤0.001           | 0.33 (0.20-0.55) |                  | ≤0.001           |                  |
|          | KTR-ND           | 0.15 (0.10-0.22) | 0.506             | 0.32 (0.19-0.54) | 0.232            | ≤0.001           | 0.36 (0.22-0.60) | 0.434            | 0.264            | ≤0.001           | 0.29 (0.18-0.47) | 0.264            | ≤0.001           |
|          | KTR-DD           | 0.14 (0.09-0.22) |                   | 0.21 (0.13-0.33) |                  | ≤0.001           | 0.28 (0.16-0.48) |                  | 0.033            | 0.001            | 0.21 (0.14-0.32) |                  | 0.046            |
| 3        | WLP-ND           | 0.05 (0.03-0.07) | 0.690             | 0.17 (0.09-0.31) | 0.906            | ≤0.001           | 0.21 (0.11-0.41) | 0.963            | 0.245            | ≤0.001           | 0.13 (0.08-0.23) | 0.842            | ≤0.001           |
|          | WLP-DD           | 0.06 (0.03-0.09) |                   | 0.16 (0.08-0.29) |                  | ≤0.001           | 0.20 (0.11-0.38) |                  | 0.122            | ≤0.001           | 0.14 (0.08-0.22) |                  | ≤0.001           |
|          | KTR-ND           | 0.07 (0.05-0.10) | 0.685             | 0.09 (0.06-0.14) | 0.702            | 0.014            | 0.12 (0.07-0.18) | 0.764            | 0.035            | ≤0.001           | 0.10 (0.07-0.15) | 0.698            | 0.005            |
|          | KTR-DD           | 0.07 (0.04-0.12) |                   | 0.10 (0.06-0.18) |                  | ≤0.001           | 0.12 (0.07-0.22) |                  | 0.008            | ≤0.001           | 0.11 (0.06-0.19) |                  | 0.055            |
| 4        | WLP-ND           | 0.10 (0.07-0.14) | 0.595             | 0.29 (0.16-0.51) | 0.204            | ≤0.001           | 0.27 (0.15-0.49) | 0.079            | 0.658            | ≤0.001           | 0.20 (0.12-0.31) | 0.026            | ≤0.001           |
|          | WLP-DD           | 0.12 (0.08-0.20) |                   | 0.48 (0.24-.96)  |                  | ≤0.001           | 0.60 (0.29-1.23) |                  | .236             | ≤0.001           | 0.41 (0.26-0.64) |                  | ≤0.001           |
|          | KTR-ND           | 0.13 (0.09-0.19) | 0.198             | 0.22 (0.14-0.36) | 0.153            | ≤0.001           | 0.27 (0.17-0.43) | 0.028            | 0.048            | ≤0.001           | 0.27 (0.19-0.40) | 0.055            | ≤0.001           |
|          | KTR-DD           | 0.09 (0.07-0.12) |                   | 0.14 (0.10-0.19) |                  | 0.006            | 0.14 (0.10-0.20) |                  | 0.936            | 0.027            | 0.17 (0.12-0.23) |                  | 0.003            |
| 5        | WLP-ND           | 0.13 (0.06-0.28) | 0.836             | 0.68 (0.30-1.57) | 0.647            | ≤0.001           | 0.80 (0.38-1.70) | 0.840            | 0.644            | ≤0.001           | 0.39 (0.19-0.82) | 0.729            | ≤0.001           |
|          | WLP-DD           | 0.10 (0.06-0.16) |                   | 0.49 (0.22-1.10) |                  | ≤0.001           | 0.70 (0.32-1.53) |                  | 0.616            | ≤0.001           | 0.47 (0.23-0.94) |                  | ≤0.001           |
|          | KTR-ND           | 0.09 (0.06-0.14) | 0.782             | 0.24 (0.13-0.45) | 0.552            | ≤0.001           | 0.35 (0.19-0.64) | 0.096            | 0.005            | ≤0.001           | 0.27 (0.15-0.48) | 0.187            | ≤0.001           |
|          | KTR-DD           | 0.08 (0.05-0.14) |                   | 0.16 (0.10-0.28) |                  | 0.004            | 0.18 (0.11-0.30) |                  | 0.893            | 0.003            | 0.16 (0.09-0.27) |                  | ≤0.001           |
| 6B       | WLP-ND           | 0.20 (0.12-0.32) | 0.767             | 0.73 (0.32-1.67) | 0.636            | ≤0.001           | 0.62 (0.27-1.42) | 0.359            | 0.072            | ≤0.001           | 0.51 (0.26-1.01) | 0.487            | ≤0.001           |
|          | WLP-DD           | 0.17 (0.11-0.28) |                   | 0.92 (0.42-1.99) |                  | ≤0.001           | 1.08 (0.52-2.22) |                  | 0.452            | ≤0.001           | 0.68 (0.36-1.27) |                  | ≤0.001           |
|          | KTR-ND           | 0.21 (0.14-0.31) | 0.995             | 0.46 (0.25-0.84) | 0.902            | ≤0.001           | 0.53 (0.30-0.94) | 0.693            | 0.230            | ≤0.001           | 0.44 (0.26-0.73) | 0.737            | ≤0.001           |
|          | KTR-DD           | 0.24 (0.14-0.40) |                   | 0.46 (0.23-0.94) |                  | ≤0.001           | 0.49 (0.25-0.93) |                  | 0.177            | 0.002            | 0.44 (0.24-0.80) |                  | 0.002            |
| 7F       | WLP-ND           | 0.17 (0.10-0.30) | 0.890             | 1.33 (0.71-2.48) | 0.636            | ≤0.001           | 1.29 (0.69-2.41) | 0.367            | 0.349            | ≤0.001           | 0.52 (0.30-0.90) | 0.303            | 0.001            |
|          | WLP-DD           | 0.16 (0.09-0.29) |                   | 1.50 (0.73-3.05) |                  | ≤0.001           | 1.87 (0.96-3.65) |                  | 0.295            | ≤0.001           | 0.80 (0.42-1.52) |                  | ≤0.001           |
|          | KTR-ND           | 0.21 (0.14-0.30) | 0.353             | 0.68 (0.38-1.21) | 0.809            | ≤0.001           | 0.82 (0.47-1.44) | 0.883            | 0.177            | ≤0.001           | 0.53 (0.32-0.87) | 0.861            | ≤0.001           |
|          | KTR-DD           | 0.27 (0.17-0.42) |                   | 0.65 (0.42-1.02) |                  | ≤0.001           | 0.80 (0.50-1.27) |                  | 0.272            | ≤0.001           | 0.50 (0.33-0.75) |                  | ≤0.001           |
| 9V       | WLP-ND           | 0.11 (0.07-0.17) | 0.844             | 0.53 (0.29-0.97) | 0.595            | ≤0.001           | 0.54 (0.31-.92)  | 0.171            | 0.245            | ≤0.001           | 0.35 (0.22-0.58) | 0.377            | ≤0.001           |
|          | WLP-DD           | 0.12 (0.08-0.17) |                   | 0.65 (0.34-1.26) |                  | ≤0.001           | 0.96 (0.55-1.67) |                  | 0.982            | ≤0.001           | 0.49 (0.28-0.85) |                  | ≤0.001           |
|          | KTR-ND           | 0.14 (0.09-0.20) | 0.400             | 0.41 (0.22-0.78) | 0.601            | ≤0.001           | 0.48 (0.26-0.88) | 0.510            | 0.331            | ≤0.001           | 0.38 (0.22-0.63) | 0.441            | ≤0.001           |
|          | KTR-DD           | 0.18 (0.11-0.29) |                   | 0.33 (0.19-0.56) |                  | ≤0.001           | 0.37 (0.22-0.62) |                  | 0.288            | ≤0.001           | 0.28 (0.17-0.48) |                  | 0.161            |

|            |        |                  |       |                  |       |        |                   |       |       |        |                  |       |        |
|------------|--------|------------------|-------|------------------|-------|--------|-------------------|-------|-------|--------|------------------|-------|--------|
| <b>14</b>  | WLP-ND | 0.70 (0.34-1.46) | 0.722 | 3.86 (2.07-7.23) | 0.802 | ≤0.001 | 4.47 (2.25-8.89)  | 0.630 | 0.221 | ≤0.001 | 2.49 (1.24-4.97) | 0.565 | ≤0.001 |
|            | WLP-DD | 0.83 (0.44-1.57) |       | 3.97 (1.99-7.90) |       | ≤0.001 | 5.83 (2.94-11.54) |       | 0.023 | ≤0.001 | 3.28 (1.64-6.57) |       | ≤0.001 |
|            | KTR-ND | 0.79 (0.47-1.33) | 0.792 | 2.02 (1.15-3.53) | 0.958 | ≤0.001 | 2.35 (1.31-4.21)  | 0.930 | 0.172 | ≤0.001 | 1.64 (0.95-2.84) | 0.966 | 0.002  |
|            | KTR-DD | 0.88 (0.48-1.58) |       | 1.91 (1.10-3.33) |       | ≤0.001 | 2.24 (1.26-3.97)  |       | 0.053 | ≤0.001 | 1.66 (0.99-2.79) |       | 0.017  |
| <b>18C</b> | WLP-ND | 0.40 (0.25-0.63) | 0.889 | 2.85 (1.68-4.82) | 0.824 | ≤0.001 | 2.70 (1.51-4.82)  | 0.803 | 0.453 | ≤0.001 | 1.34 (0.81-2.24) | 0.734 | ≤0.001 |
|            | WLP-DD | 0.38 (0.24-0.62) |       | 2.02 (1.07-3.80) |       | ≤0.001 | 2.51 (1.28-4.93)  |       | 0.802 | ≤0.001 | 1.51 (0.88-2.60) |       | ≤0.001 |
|            | KTR-ND | 0.32 (0.22-0.47) | 0.200 | 0.83 (0.51-1.35) | 0.883 | ≤0.001 | 0.96 (0.57-1.62)  | 0.819 | 0.006 | ≤0.001 | 0.83 (0.54-1.29) | 0.755 | ≤0.001 |
|            | KTR-DD | 0.47 (0.30-0.72) |       | .85 (0.56-1.31)  |       | ≤0.001 | 0.93 (0.56-1.54)  |       | 0.029 | ≤0.001 | 0.82 (0.51-1.33) |       | 0.008  |
| <b>19A</b> | WLP-ND | 0.42 (0.22-0.79) | 0.668 | 1.58 (0.73-3.41) | 0.460 | ≤0.001 | 1.59 (0.70-3.61)  | 0.455 | 0.349 | ≤0.001 | 0.95 (0.44-2.05) | 0.193 | ≤0.001 |
|            | WLP-DD | 0.50 (0.25-1.01) |       | 2.29 (1.12-4.69) |       | ≤0.001 | 2.39 (1.09-5.27)  |       | 0.236 | ≤0.001 | 1.85 (0.93-3.68) |       | ≤0.001 |
|            | KTR-ND | 0.35 (0.21-0.60) | 0.282 | .79 (0.41-1.51)  | 0.995 | 0.006  | 0.81 (0.41-1.62)  | 0.911 | 0.474 | ≤0.001 | 0.70 (0.38-1.30) | 0.646 | ≤0.001 |
|            | KTR-DD | 0.56 (0.32-0.99) |       | .81 (0.48-1.37)  |       | 0.029  | 0.84 (0.46-1.53)  |       | 0.879 | 0.091  | 0.81 (0.50-1.31) |       | 0.075  |
| <b>19F</b> | WLP-ND | 0.53 (0.32-0.88) | 0.813 | 1.83 (0.99-3.39) | 0.605 | ≤0.001 | 2.13 (1.17-3.86)  | 0.779 | 0.565 | ≤0.001 | 1.46 (0.86-2.48) | 0.501 | ≤0.001 |
|            | WLP-DD | 0.45 (0.29-0.69) |       | 1.54 (0.79-3.04) |       | ≤0.001 | 1.85 (0.96-3.55)  |       | 0.846 | ≤0.001 | 1.77 (1.07-2.92) |       | ≤0.001 |
|            | KTR-ND | 0.56 (0.36-0.86) | 0.883 | .93 (0.54-1.61)  | 0.568 | ≤0.001 | 1.04 (0.59-1.82)  | 0.387 | 0.216 | ≤0.001 | 1.10 (0.66-1.83) | 0.823 | ≤0.001 |
|            | KTR-DD | 0.53 (0.34-0.81) |       | .69 (0.44-1.10)  |       | 0.034  | 0.73 (0.44-1.21)  |       | 0.741 | 0.161  | 0.94 (0.59-1.50) |       | 0.011  |
| <b>23F</b> | WLP-ND | 0.30 (0.20-0.45) | 0.487 | 1.08 (0.59-1.97) | 0.194 | ≤0.001 | 0.99 (0.52-1.89)  | 0.050 | 0.934 | ≤0.001 | 0.75 (0.43-1.34) | 0.416 | ≤0.001 |
|            | WLP-DD | 0.38 (0.25-0.57) |       | 1.92 (0.99-3.73) |       | ≤0.001 | 2.44 (1.26-4.71)  |       | 0.716 | ≤0.001 | 1.10 (0.57-2.11) |       | ≤0.001 |
|            | KTR-ND | 0.25 (0.18-0.35) | 0.053 | 0.66 (0.39-1.13) | 0.932 | ≤0.001 | 0.69 (0.39-1.24)  | 0.700 | 0.093 | ≤0.001 | 0.63 (0.38-1.04) | 0.967 | ≤0.001 |
|            | KTR-DD | 0.43 (0.29-0.63) |       | 0.68 (0.45-1.02) |       | ≤0.001 | 0.80 (0.51-1.26)  |       | 0.106 | ≤0.001 | 0.57 (0.38-0.87) |       | 0.166  |

Abbreviations: GMC, Geometric mean concentration; CI, confidence interval; WLP-ND, patients on the kidney transplant waiting list – normal dose; WLP-DD, patients on the kidney transplant waiting list – double dose; KTR-ND, kidney transplant recipients – normal dose; KTR-DD, kidney transplant recipients – double dose; ND, normal dose; DD, double dose

**Supplementary Table S2: T/B/NK cells at baseline for a subgroup of kidney transplant candidates and recipients.**

|                                                                    | <b>WLPs</b><br>(n=32) | <b>KTRs</b><br>(n=58) | <b>p-value</b> |
|--------------------------------------------------------------------|-----------------------|-----------------------|----------------|
| <b>Normal dosage vaccines, N (%)</b>                               | 16 (50)               | 32 (55.2)             | 0.638          |
| <b>Age, median years (IQR)</b>                                     | 50.5 (40-58)          | 50.5 (41-60)          | 0.406          |
| <b>Absolute lymphocyte count x 10<sup>3</sup>/μL, median (IQR)</b> | 1.28 (1.06-1.65)      | 1.06 (0.77-1.58)      | 0.028          |
| <i>T-cells: CD3+ x10<sup>3</sup>/μL, median (IQR)</i>              | 1.00 (0.73-1.28)      | 0.89 (0.58-1.25)      | 0.092          |
| • <i>Helper T-cells: CD4+ x10<sup>3</sup>/μL, median (IQR)</i>     | 0.66 (0.47-0.78)      | 0.53 (0.27-0.72)      | 0.046          |
| • <i>Cytotoxic T-cells: CD8+ x10<sup>3</sup>/μL, median (IQR)</i>  | 0.31 (0.19-0.54)      | 0.31 (0.2-0.43)       | 0.607          |
| <i>B-cells: CD19+ x10<sup>3</sup>/μL, median (IQR)</i>             | 0.08 (0.04-0.19)      | 0.07 (0.04-0.13)      | 0.357          |
| <i>NK-cells: CD3-/CD16-56+ x 10<sup>3</sup>/μL, median (IQR)</i>   | 0.18 (0.12-0.26)      | 0.12 (0.09-0.17)      | 0.007          |

Abbreviations: WLPs, patients on the kidney transplant waiting list; KTRs, kidney transplant recipients
